# Supplementary material
Source: MDPI journal article supplement (https://www.mdpi.com/2227-9717/10/12/2565)
Supplement: s1 [file s1]

## **Supplementary Material**

# **Azithromycin Adsorption onto Different Soils**

**Raquel Cela-Dablanca <sup>1,\*</sup>, Ana Barreiro <sup>1</sup>, Lucía Rodríguez-López <sup>2</sup>, Paula Pérez-Rodríguez <sup>2</sup>, Manuel Arias-Estévez <sup>2</sup>, María J. Fernández-Sanjurjo <sup>1</sup>, Esperanza Álvarez-Rodríguez <sup>1</sup> and Avelino Núñez-Delgado <sup>1</sup>**

<sup>1</sup> Department Soil Science and Agricultural Chemistry, Engineering Polytechnic School, Universidad Santiago de Compostela, 27002 Lugo, Spain

<sup>2</sup> Soil Science and Agricultural Chemistry, Faculty Sciences, University of Vigo, 32004 Ourense, Spain

\* Correspondence: raquel.dablanca@usc.es

**Table S1.** Basic details corresponding to the different soils used in this work. M: maize (corn) soils; VO: vineyard soils (Ourense province); VP: vineyard soils (Pontevedra province); F: forest soils

| Code | Crop/Trees  | Parent material                                        | Mean temperature (° C) | Annual rainfall (mm) |
|------|-------------|--------------------------------------------------------|------------------------|----------------------|
| M1   | Corn        | Schists, quartzite,<br>pelite, sandstones and granites | 12                     | 995                  |
| M2   | Corn        | Schist and amphibolite                                 | 13                     | 1270                 |
| M3   |             |                                                        |                        |                      |
| M4   |             |                                                        |                        |                      |
| M5   |             |                                                        |                        |                      |
| M6   |             |                                                        |                        |                      |
| VO1  | Vineyard    | Schist                                                 | 11                     | 850-1000             |
| VO2  |             | Slate                                                  |                        |                      |
| VO3  |             | Slate                                                  |                        |                      |
| VO4  | Vineyard    | Granite and mica-schists                               | 14.5                   | 950                  |
| VO5  |             |                                                        |                        |                      |
| VP1  | Vineyard    | Granite                                                | 13.8                   | 1540                 |
| VP2  |             |                                                        |                        |                      |
| VP3  |             |                                                        |                        |                      |
| VP4  | Vineyard    | Granite                                                | 14                     | 1000-2000            |
| VP5  |             |                                                        |                        |                      |
| VP6  | Vineyard    | Granite                                                | 13.8                   | 1540                 |
| VP7  |             |                                                        |                        |                      |
| FP   | Pine,       | Granite and gneiss                                     | 11.2                   | 1389                 |
| FE   | Eucalyptus, |                                                        |                        |                      |
| FR   | Q. robur    |                                                        |                        |                      |

**Table S2.** Values corresponding to the basic parameters determined in the various soils studied. M: maize (corn) soils; VO: vineyard soils (Ourense province); VP: vineyard soils (Pontevedra province); F: forest soils. OC: organic carbon; OM: organic matter; N: nitrogen; eCEC: effective cation exchange capacity; Al<sub>ox</sub> and Fe<sub>ox</sub>: Al and Fe extracted with ammonium oxalate; Al<sub>pir</sub> and Fe<sub>pir</sub>: Al and Fe extracted with sodium pyrophosphate. Average values (n=3), with coefficients of variation always < 5%

| Soil | pH <sub>H2O</sub> | OC   | OM    | N    | Sand  | clay  | eCEC                               | Ca    | Mg   | Na   | K     | Al    | Fe <sub>ox</sub>    | Fe <sub>pir</sub> | Al <sub>ox</sub> | Al <sub>pir</sub> |
|------|-------------------|------|-------|------|-------|-------|------------------------------------|-------|------|------|-------|-------|---------------------|-------------------|------------------|-------------------|
|      |                   | %    |       |      |       |       | cmol <sub>c</sub> kg <sup>-1</sup> |       |      |      |       |       | mg kg <sup>-1</sup> |                   |                  |                   |
| M1   | 8.02              | 4.98 | 8.58  | 0.33 | 49.57 | 22.50 | 42.81                              | 39.44 | 2.07 | 0.60 | 0.69  | 0.01  | 4140                | 1501              | 5351             | 2111              |
| M2   | 5.33              | 2.66 | 4.59  | 0.27 | 43.42 | 24.65 | 6.88                               | 5.35  | 0.67 | 0.02 | 0.44  | 0.40  | 5745                | 3159              | 3401             | 2871              |
| M3   | 5.65              | 2.58 | 4.44  | 0.25 | 43.57 | 22.43 | 7.48                               | 6.18  | 0.77 | 0.00 | 0.28  | 0.24  | 5780                | 3315              | 3881             | 2717              |
| M4   | 5.01              | 2.04 | 3.52  | 0.21 | 45.64 | 22.43 | 5.94                               | 4.58  | 0.67 | 0.10 | 0.17  | 0.43  | 4545                | 2923              | 2896             | 1945              |
| M5   | 6.11              | 7.67 | 13.21 | 0.63 | 63.35 | 12.36 | 20.84                              | 18.81 | 1.60 | 0.08 | 0.33  | 0.02  | 6990                | 3719              | 11651            | 6179              |
| M6   | 6.43              | 5.56 | 9.59  | 0.53 | 59.28 | 16.50 | 24.35                              | 21.65 | 1.60 | 0.16 | 0.93  | 0.02  | 6525                | 3231              | 4991             | 4087              |
| VO1  | 5.6               | 0.63 | 1.09  | 0.06 | 61.40 | 13.14 | 5.96                               | 2.85  | 0.73 | 1.39 | 0.31  | 0.68  | 1665                | 1273              | 634              | 1961              |
| VO2  | 5.7               | 1.00 | 1.72  | 0.11 | 48.05 | 22.44 | 5.43                               | 3.15  | 0.32 | 1.48 | 0.43  | <0.06 | 2515                | 715               | 484              | 173               |
| VO3  | 5.6               | 1.61 | 2.78  | 0.18 | 43.50 | 22.90 | 6.02                               | 3.38  | 0.26 | 1.83 | 0.5   | <0.06 | 2555                | 1047              | 894              | 1047              |
| VO4  | 5.87              | 1.94 | 3.35  | 0.11 | 47.50 | 18.22 | 6.41                               | 3.69  | 0.88 | 0.15 | 0.52  | 1.17  | 1980                | 1421              | 1601             | 1321              |
| VO5  | 6.04              | 1.77 | 3.06  | 0.10 | 49.57 | 24.14 | 7.42                               | 4.94  | 0.86 | 0.16 | 0.69  | 0.77  | 1790                | 1171              | 1556             | 1141              |
| VP1  | 5.6               | 3.69 | 6.36  | 0.26 | 68.60 | 14.23 | 19.52                              | 4.74  | 1.07 | 1.64 | 11.91 | 0.16  | 3045                | 2353              | 5739             | 4543              |
| VP2  | 6.1               | 4.38 | 7.55  | 0.37 | 50.16 | 20.25 | 22.58                              | 8.43  | 1.56 | 2.46 | 10.12 | <0.05 | 3220                | 6309              | 4024             | 3897              |
| VP3  | 6.1               | 2.83 | 4.88  | 0.23 | 60.62 | 18.35 | 37.23                              | 6.33  | 1.48 | 18   | 11.4  | <0.05 | 3460                | 4889              | 4294             | 3005              |
| VP4  | 5.5               | 6.58 | 11.35 | 0.49 | 65.54 | 21.07 | 10.51                              | 6.55  | 0.37 | 2.60 | 0.27  | 0.72  | 3540                | 6459              | 6624             | 14857             |
| VP5  | 5.7               | 4.81 | 8.30  | 0.40 | 58.22 | 21.38 | 17.36                              | 13.40 | 1.09 | 2.32 | 0.55  | <0.10 | 2765                | 4519              | 3679             | 3965              |
| VP6  | 7.05              | 2.43 | 4.19  | 0.14 | 67.42 | 22.43 | 9.09                               | 8.11  | 0.51 | 0.08 | 0.37  | 0.02  | 1720                | 1225              | 3981             | 1703              |
| VP7  | 7.27              | 3.56 | 6.14  | 0.22 | 67.50 | 12.22 | 12.32                              | 10.53 | 1.04 | 0.44 | 0.27  | 0.04  | 1945                | 823               | 4576             | 1597              |
| FP   | 4.88              | 7.70 | 13.27 | 0.48 | 69.35 | 12.86 | 6.43                               | 0.07  | 0.00 | 0.11 | 0.09  | 6.16  | 5410                | 9239              | 8184             | 10767             |
| FE   | 4.8               | 9.78 | 16.87 | 0.67 | 67.28 | 12.86 | 6.59                               | 0.05  | 0.00 | 0.12 | 0.12  | 6.29  | 5805                | 8249              | 10189            | 11347             |
| FR   | 4.68              | 7.15 | 12.32 | 0.49 | 69.35 | 14.86 | 7.48                               | 0.18  | 0.07 | 0.00 | 0.22  | 7.01  | 3055                | 6789              | 5619             | 9457              |

**Table S3.** AZM adsorption expressed in  $\mu\text{mol kg}^{-1}$  (and in percentage between brackets), for the soils studied, as a function of the concentration of antibiotic added. M: maize (corn) soils; VO: vineyard soils (Ourense province); VP: vineyard soils (Pontevedra province); F: forest soils. Average values (n=3), with coefficients of variation always < 5%

| Soil     |                                    | Soil                                 |            |                                      |
|----------|------------------------------------|--------------------------------------|------------|--------------------------------------|
| M1       | AZM added<br>( $\mu\text{mol/L}$ ) | AZM adsorbed.<br>concentration and % | VP2        | AZM adsorbed.<br>concentration and % |
|          |                                    |                                      |            |                                      |
| M1<br>M2 | 0                                  | 0 (0)                                | VP2<br>VP2 | 0 (0)                                |
|          | 2.5                                | 0 (0)                                |            | 6.25 (100)                           |
|          | 5                                  | 12.44 (100)                          |            | 12.44 (100)                          |
|          | 10                                 | 24.88 (100)                          |            | 25.00 (100)                          |
|          | 20                                 | 50.00 (100)                          |            | 49.75 (100)                          |
|          | 30                                 | 74.63 (100)                          |            | 75.00 (100)                          |
|          | 40                                 | 100 (100)                            |            | 100.00 (100)                         |
|          | 50                                 | 115.77 (100)                         |            | 116.35 (100)                         |
|          | 200                                | 425.85 (85.60)                       |            | 130.60 (26.12)                       |
|          | 400                                | 750.40 (70.88)                       |            | 383.40 (36.03)                       |
|          | 600                                | 754.04 (52.30)                       |            | 401.27 (27.83)                       |
| M2<br>M3 | 0                                  | 0 (0)                                | VP2<br>VP3 | 0 (0)                                |
|          | 2.5                                | 6.25 (100)                           |            | 6.22 (100)                           |
|          | 5                                  | 12.44 (100)                          |            | 12.44 (100)                          |
|          | 10                                 | 24.88 (100)                          |            | 25.00 (100)                          |
|          | 20                                 | 50.00 (100)                          |            | 49.75 (100)                          |
|          | 30                                 | 75.00 (100)                          |            | 75.00 (100)                          |
|          | 40                                 | 99.50 (100)                          |            | 99.50 (100)                          |
|          | 50                                 | 115.77 (100)                         |            | 116.35 (100)                         |
|          | 200                                | 464.62 (93.39)                       |            | 388.81 (78.15)                       |
|          | 400                                | 824.86 (77.53)                       |            | 555.55 (52.48)                       |
|          | 600                                | 775.53 (54.05)                       |            | 559.44 (38.80)                       |
| M3       | 0                                  | 0 (0)                                | VP3        | 0 (0)                                |
|          | 2.5                                | 6.25 (100)                           |            | 6.22 (100)                           |
|          | 5                                  | 12.44 (100)                          |            | 12.44 (100)                          |
|          | 10                                 | 25.00 (100)                          |            | 25.00 (100)                          |
|          | 20                                 | 49.75 (100)                          |            | 49.75 (100)                          |
|          | 30                                 | 75.00 (100)                          |            | 74.63 (100)                          |
|          | 40                                 | 99.50 (100)                          |            | 99.50 (100)                          |
|          | 50                                 | 115.77 (100)                         |            | 115.77 (100)                         |
|          | 200                                | 479.98 (96)                          |            | 277.23 (55.72)                       |
|          | 400                                | 785.36 (74.18)                       |            | 630.94 (59.60)                       |
|          | 600                                | 825.44 (57.25)                       |            | 667.08 (46.26)                       |

|           |     |                 |                          |     |                 |
|-----------|-----|-----------------|--------------------------|-----|-----------------|
| M4        | 0   | 0 (0)           | VP4                      | 0   | 0 (0)           |
|           | 2.5 | 6.22 (100)      |                          | 2.5 | 6.25 (100)      |
|           | 5   | 12.44 (100)     |                          | 5   | 12.50 (100)     |
|           | 10  | 25.00 (100)     |                          | 10  | 24.88 (100)     |
|           | 20  | 49.75 (100)     | VP4                      | 20  | 50.00 (100)     |
|           | 30  | 74.63 (100)     |                          | 30  | 75.00 (100)     |
|           | 40  | 100.00 (100)    |                          | 40  | 99.50 (100)     |
|           | 50  | 116.35 (100)    |                          | 50  | 116.35 (100)    |
|           | 200 | 497.51 (100)    | VP4<br>VP5<br>VP5        | 200 | 133.22 (26.78)  |
|           | 400 | 849.73 (80.26)  |                          | 400 | 622.20 (58.77)  |
| M4<br>M5  | 600 | 799.38 (55.44)  |                          | 600 | 638.92 (44.31)  |
| M5<br>M6  | 0   | 0 (0)           | VP5<br>VP6<br>VP6<br>VP7 | 0   | 0 (0)           |
|           | 2.5 | 6.25 (100)      |                          | 2.5 | 6.25 (100)      |
|           | 5   | 12.50 (100)     |                          | 5   | 12.44 (100)     |
|           | 10  | 25.00 (100)     |                          | 10  | 25.00 (100)     |
|           | 20  | 50.00 (100)     |                          | 20  | 50.00 (100)     |
|           | 30  | 75.00 (100)     |                          | 30  | 75.00 (100)     |
|           | 40  | 99.50 (100)     |                          | 40  | 99.50 (100)     |
|           | 50  | 115.77 (100)    |                          | 50  | 116.35 (100)    |
|           | 200 | 497.51 (100)    |                          | 200 | 368.40 (73.68)  |
|           | 400 | 923.49 (88.97)  |                          | 400 | 802.96 (75.47)  |
| M5<br>M6  | 600 | 975.90 (68.70)  |                          | 600 | 1125.46(78.05)  |
| M6<br>VO1 | 0   | 0 (0)           | VP6<br>VP7<br>VP7        | 0   | 0 (0)           |
|           | 2.5 | 6.25 (100)      |                          | 2.5 | 6.25 (100)      |
|           | 5   | 12.44 (100)     |                          | 5   | 12.50 (100)     |
|           | 10  | 24.88 (100)     |                          | 10  | 25.00 (100)     |
|           | 20  | 49.75 (100)     |                          | 20  | 49.75 (100)     |
|           | 30  | 74.63 (100)     |                          | 30  | 74.63 (100)     |
|           | 40  | 100.00 (100)    |                          | 40  | 100.00 (100)    |
|           | 50  | 115.77 (100)    |                          | 50  | 115.77 (100)    |
|           | 200 | 500.00 (100)    |                          | 200 | 490.20 (100)    |
|           | 400 | 1063.98 (100)   |                          | 400 | 1058.69 (100)   |
| M6<br>VO1 | 600 | 1256.77 (87.16) |                          | 600 | 1318.21(93.25)  |
| VO1       | 0   | 0 (0)           | VP7<br>FP                | 0   | 0 (0)           |
|           | 2.5 | 6.22 (100)      |                          | 2.5 | 6.25 (100)      |
|           | 5   | 12.44 (100)     |                          | 5   | 12.44 (100)     |
|           | 10  | 25.00 (100)     |                          | 10  | 25.00 (100)     |
|           | 20  | 49.75 (100)     |                          | 20  | 50.00 (100)     |
|           | 30  | 75.00 (100)     |                          | 30  | 75.00 (100)     |
|           | 40  | 100.00 (100)    |                          | 40  | 100.00 (100)    |
|           | 50  | 116.35 (100)    |                          | 50  | 116.35 (100)    |
|           | 200 | 500.00 (100)    |                          | 200 | 497.51 (100)    |
|           | 400 | 957.74 (90.47)  |                          | 400 | 1027.40 (98.01) |
| VO1       | 600 | 941.88 (65.32)  |                          | 600 | 1094.55 (76.67) |

|     |     |                 |    |     |                |
|-----|-----|-----------------|----|-----|----------------|
|     | 0   | 0 (0)           |    | 0   | 0 (0)          |
|     | 2.5 | 6.25 (100)      |    | 2.5 | 6.25 (100)     |
|     | 5   | 12.50 (100)     |    | 5   | 12.44 (100)    |
|     | 10  | 24.88 (100)     |    | 10  | 24.88 (100)    |
|     |     |                 | FP |     |                |
|     |     |                 | FE |     |                |
|     |     |                 | FE |     |                |
|     |     |                 | FR |     |                |
|     | 20  | 49.75 (100)     |    | 20  | 49.75 (100)    |
|     |     |                 | FP |     |                |
| VO2 | 30  | 75.00 (100)     |    | 30  | 75.00 (100)    |
|     | 40  | 99.50 (100)     |    | 40  | 99.50 (100)    |
|     | 50  | 116.35(100)     |    | 50  | 116.35 (100)   |
|     | 200 | 459.23 (91.85)  |    | 200 | 174.23 (35.54) |
|     | 400 | 570.73 (53.64)  | FP | 400 | 186.81 (17.99) |
|     | 600 | 690.96 (47.92)  | FE | 600 | 205.02 (14.22) |
| VO2 |     |                 | FE |     |                |
| VO3 | 0   | 0 (0)           | FR | 0   | 0 (0)          |
|     | 2.5 | 6.25 (100)      | FE | 2.5 | 6.25 (100)     |
|     | 5   | 12.50 (100)     | FR | 5   | 12.50 (100)    |
|     | 10  | 25.00 (100)     | FR | 10  | 24.88 (100)    |
|     | 20  | 50.00 (100)     |    | 20  | 49.75 (100)    |
|     | 30  | 75.00 (100)     |    | 30  | 75.00 (100)    |
|     | 40  | 99.50 (100)     |    | 40  | 100.00 (100)   |
|     | 50  | 116.35 (100)    |    | 50  | 116.35 (100)   |
|     | 200 | 497.51 (100)    |    | 200 | 175.00 (37.26) |
|     | 400 | 947.65 (89.07)  |    | 400 | 186.73 (19.79) |
|     | 600 | 933.52 (64.73)  | FE | 600 | 187.29 (15.95) |
| VO3 |     |                 | FR |     |                |
| VO4 | 0   | 0 (0)           | FR | 0   | 0 (0)          |
|     | 2.5 | 6.22 (100)      | FR | 2.5 | 6.22 (100)     |
|     | 5   | 12.50 (100)     |    | 5   | 12.50 (100)    |
|     | 10  | 24.88 (100)     |    | 10  | 24.88 (100)    |
|     | 20  | 50.00 (100)     |    | 20  | 49.75 (100)    |
|     | 30  | 74.63 (100)     |    | 30  | 74.63 (100)    |
|     | 40  | 100.00 (100)    |    | 40  | 99.50 (100)    |
|     | 50  | 116.35 (100)    |    | 50  | 116.35 (100)   |
|     | 200 | 492.61 (100)    |    | 200 | 183.57 (35)    |
|     | 400 | 1048.26 (100)   |    | 400 | 209.51 (17.73) |
|     | 600 | 1229.38 (85.26) |    | 600 | 228.84 (13.25) |
| VO4 |     |                 |    |     |                |
| VO5 | 0   | 0 (0)           | FR |     |                |
|     | 2.5 | 6.25 (100)      |    |     |                |
|     | 5   | 12.50 (100)     |    |     |                |
|     | 10  | 25.00 (100)     |    |     |                |
|     | 20  | 50.00 (100)     |    |     |                |
|     | 30  | 75.00 (100)     |    |     |                |
|     | 40  | 100.00 (100)    |    |     |                |
|     | 50  | 116.35 (100)    |    |     |                |
| VO5 | 200 | 490.20 (100)    |    |     |                |
|     | 400 | 1043.12 (100)   |    |     |                |



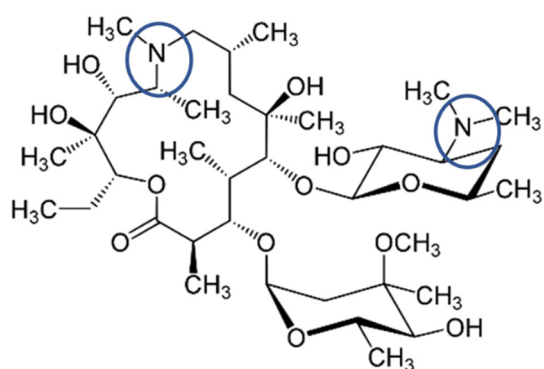

**Figure S2.** Molecular structure of AZM with amine groups remarked



Soil VP1; AZM concentration added 600  $\mu$ M

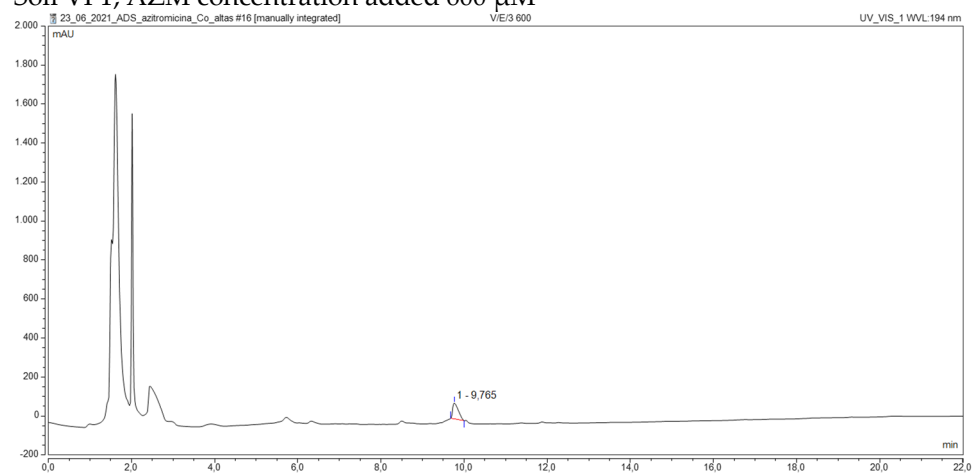

Soil M1; AZM concentration added 600  $\mu$ M

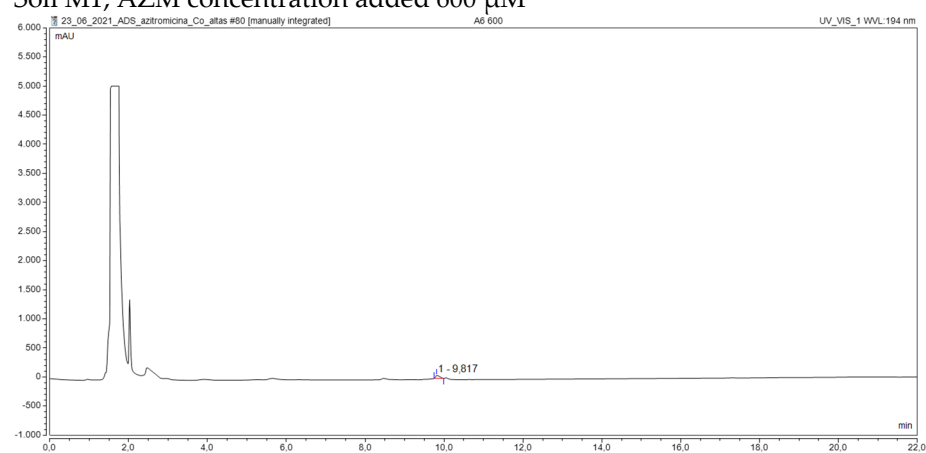

Figure S3. Selected chromatograms corresponding to AZM adsorption onto soils
